# Supplementary material for: Newborn self-inflating manual resuscitators: precision robotic testing of safety and reliability
Source: PubMed Central journal article supplement — Arch Dis Child Fetal Neonatal Ed. 2018 Sep 18;104(4):F403–8. doi: 10.1136/archdischild-2018-315391 (PMC6764255; doi:10.1136/archdischild-2018-315391), 2018-09-18
Supplement: fetalneonatal-2018-315391supp001.pdf [file fetalneonatal-2018-315391supp001.pdf]

Table S1: Characteristics of self-inflating bag models tested.

| Model ( <i>n</i> )  | ‡Type | Part No                             | Average Bag Diameter<br><i>Millimetre (50% of diameter)</i> | Over Pressure relief valve<br><i>cmH<sub>2</sub>O</i> | Weight Range Guide<br><i>kg</i> | Bag Volume <i>mL</i> |
|---------------------|-------|-------------------------------------|-------------------------------------------------------------|-------------------------------------------------------|---------------------------------|----------------------|
| 1. Laerdal (10)     | SU    | 845031<br>The Bag II                | 71.6 (35.8)                                                 | 35 +/- 5                                              | 2.5 - 12                        | 230                  |
| 2. Portex (9)       | SU    | 8527MPB<br>1 <sup>st</sup> Response | 72.7 (36.4)                                                 | 40 +/- 5                                              | ≤ 10                            | **160                |
| 3. Galemed (10)     | SU    | SHMC<br>2203WA                      | 69.9 (34.9)                                                 | 40 +/- 5                                              | < 6.5                           | 280                  |
| 4. Vital Signs (10) | SU    | 7902R Baby<br>Blue                  | 76.6 (38.3)                                                 | 40 +/- 5                                              | ≤ 10                            | **150                |
| 5. Laerdal (10)     | RU    | 8560533<br>Vertical                 | 73.5 (36.8)                                                 | 35 +/- 5                                              | ≤ 10                            | 320                  |
| 6. Laerdal (10)     | RU    | 850050                              | 70.4 (35.2)                                                 | 35 +/- 5                                              | ≤ 2.5                           | 240                  |
| 7. Ambu (10)        | SU    | SPUR II                             | 72.0 (36.0)                                                 | 40                                                    | ≤ 10                            | 220                  |
| 8. Portex (9)       | SU    | 8528M<br>1 <sup>st</sup> Response   | 72.7 (36.4)                                                 | 40 +/- 5                                              | ≤ 10                            | **160                |
| 9. Portex (9)       | SU    | 8527MP<br>1 <sup>st</sup> Response  | 72.7 (36.4)                                                 | 40 +/- 5                                              | ≤ 10                            | **160                |
| 10. Headstar (10)   | SU    | HP9333FN<br>Resus-EZY               | 75.9 (37.8)                                                 | 40 +/- 5                                              | 0 - 7                           | 300                  |
| 11. Besmed (11)     | SU    | BE-1703                             | 72.0 (36.0)                                                 | 40 +/- 5                                              | < 7                             | 280                  |
| 12. Mercury (4)     | SU    | 1055299                             | 72.0 (36.0)                                                 | 40 +/- 5                                              | < 7                             | 240                  |
| 13. Hsiner (10)     | SU    | PH60103                             | 70.5 (35.2)                                                 | 40                                                    | Max 10                          | 280                  |
| 14. Hsiner (7)      | SU    | 60152                               | 69.4 (34.7)                                                 | 40                                                    | Max 10                          | 280                  |
| 15. Hsiner (10)     | SU    | 60113-P                             | 69.3 (34.6)                                                 | 40                                                    | Max 10                          | 280                  |
| 16. Hudson RCI (9)  | SU    | 5364<br>Lifesaver                   | 70.0 (35.0)                                                 | 40 +/- 5                                              | <2.3 - <5                       | 300                  |
| 17. Besmed (10)     | SU    | BE-2701                             | 69.3 (34.6)                                                 | 40 +/- 5                                              | < 7                             | 280                  |
| 18. Hsiner (5)      | SU    | 60113                               | 70.0 (35.0)                                                 | 40                                                    | Max 10                          | 280                  |
| 19. Zeal (5)        | RU    | RSB 1001                            | 68.2 (34.1)                                                 | 40                                                    | Not stated                      | 250                  |
| 20. Meditrin (5)    | RU    | Infant<br>250mL                     | 70.3 (35.2)                                                 | 40                                                    | Low Birth Weight to Full Term   | 250                  |

Legend

\*\* Maximum stroke volume specified

‡ RU: Reusable, SU: Single Use
