# Supplementary material for: Newborn self-inflating manual resuscitators: precision robotic testing of safety and reliability
Source: PubMed Central journal article supplement — Arch Dis Child Fetal Neonatal Ed. 2018 Sep 18;104(4):F403–8. doi: 10.1136/archdischild-2018-315391 (PMC6764255; doi:10.1136/archdischild-2018-315391), 2018-09-18
Supplement: fetalneonatal-2018-315391supp003.pdf [file fetalneonatal-2018-315391supp003.pdf]

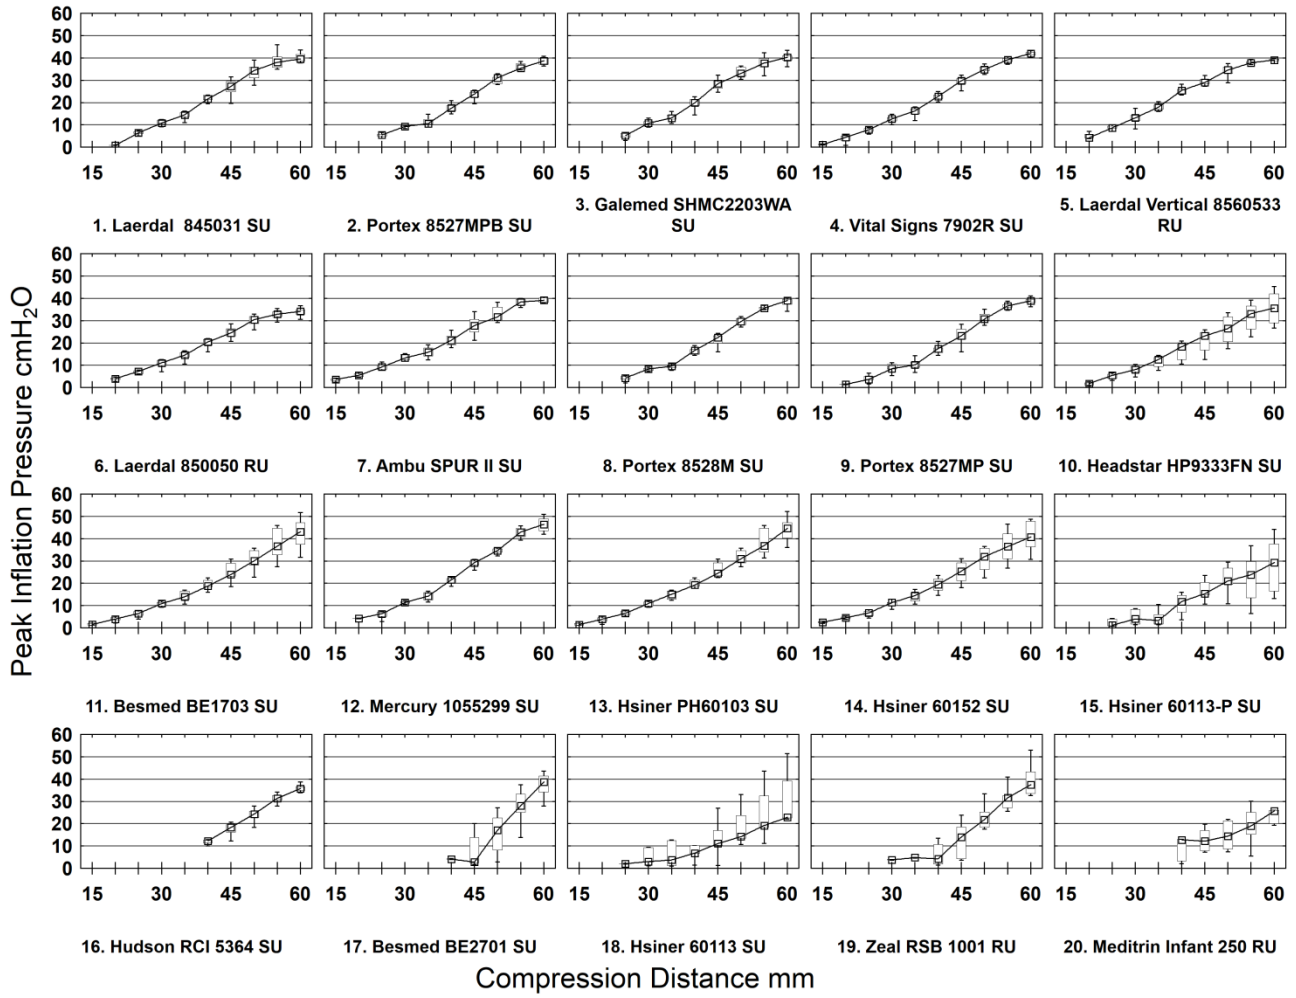

Figure S1: Box and whisker plots of delivered peak inflation pressures per SIB model batch at each compression distance with Lowess regression lines.
