# Supplementary material for: Newborn self-inflating manual resuscitators: precision robotic testing of safety and reliability
Source: PubMed Central journal article supplement — Arch Dis Child Fetal Neonatal Ed. 2018 Sep 18;104(4):F403–8. doi: 10.1136/archdischild-2018-315391 (PMC6764255; doi:10.1136/archdischild-2018-315391), 2018-09-18
Supplement: fetalneonatal-2018-315391supp005.pdf [file fetalneonatal-2018-315391supp005.pdf]

Table S2: Mean tidal volume per compression distance (Co-efficient of variation percent), per cent inflations over 45cmH<sub>2</sub>O

| Model (n = units)<br>Part No<br>Type: ‡ RU/SU | Mean Tidal Volume (Co-efficient of variation percent)<br>Compression Distance mm * |            |            |            |             |             |             |             |             |             | Average<br>Volume<br>mL (CV%) * | % of<br>inflations>45cmH <sub>2</sub> O (measurable<br>inflations/total) ^ |
|-----------------------------------------------|------------------------------------------------------------------------------------|------------|------------|------------|-------------|-------------|-------------|-------------|-------------|-------------|---------------------------------|----------------------------------------------------------------------------|
|                                               | 15                                                                                 | 20         | 25         | 30         | 35          | 40          | 45          | 50          | 55          | 60          |                                 |                                                                            |
| 1. Laerdal (10) 845031<br>SU                  |                                                                                    | 0.4 (14.2) | 4.9 (8.0)  | 8.0 (7.8)  | 10.0 (8.0)  | 13.8 (4.4)  | 16.1 (6.4)  | 18.5 (5.5)  | 19.2 (5.8)  | 19.5 (2.6)  | 12.3 (7.0)                      | 0.7 (22/3173)                                                              |
| 2. Portex (9) 8527MPB<br>SU                   |                                                                                    |            | 4.1 (17.6) | 7.3 (8.7)  | 8.5 (12.1)  | 12.2 (7.2)  | 15.1 (6.7)  | 18.0 (3.6)  | 20.0 (2.6)  | 20.3 (2.6)  | 13.2 (7.7)                      | 0 (0/2649)                                                                 |
| 3. Galemed (10) SHMC<br>2203WA SU             |                                                                                    |            | 3.9 (20.0) | 8.0 (8.2)  | 9.4 (10.5)  | 12.6 (14.1) | 16.6 (5.0)  | 18.5 (4.8)  | 19.6 (2.7)  | 19.9 (3.0)  | 13.6 (8.6)                      | 0 (0/3098)                                                                 |
| 4. Vital Signs (10) 7902R<br>SU               | 0.8 (17.7)                                                                         | 3.2 (33.6) | 5.9 (10.6) | 9.2 (6.6)  | 11.4 (6.9)  | 14.6 (3.5)  | 17.6 (4.0)  | 19.6 (2.1)  | 20.8 (3.0)  | 21.1 (1.6)  | 12.4 (9.0)                      | 0 (0/3538)                                                                 |
| 5. Laerdal (10) 8560533<br>Vertical RU        |                                                                                    | 3.8 (20.8) | 6.9 (10.5) | 9.9 (13.4) | 12.6 (13.5) | 16.0 (8.6)  | 17.6 (4.8)  | 19.3 (4.4)  | 20.1 (2.2)  | 20.6 (2.3)  | 14.1 (9.0)                      | 0 (0/3344)                                                                 |
| 6. Laerdal (10) 850050<br>RU                  |                                                                                    | 3.1 (33.6) | 5.2 (19.2) | 8.1 (12.0) | 10.2 (11.1) | 13.2 (7.1)  | 15.3 (7.2)  | 17.4 (4.2)  | 17.8 (5.5)  | 18.3 (2.7)  | 12.1 (9.3)                      | 0 (0/3448)                                                                 |
| 7. Ambu (10) SPUR II<br>SU                    | 2.5 (15.9)                                                                         | 3.8 (17.1) | 6.3 (12.2) | 8.6 (12.2) | 10.5 (14.3) | 13.7 (10.0) | 15.9 (9.1)  | 18.2 (6.8)  | 19.7 (3.3)  | 20.3 (1.5)  | 12.0 (10.2)                     | 0 (0/3652)                                                                 |
| 8. Portex (9) 8528M SU                        |                                                                                    |            | 3.2 (19.4) | 6.0 (19.1) | 7.1 (8.4)   | 11.0 (14.7) | 14.0 (8.0)  | 17.3 (7.4)  | 19.7 (5.0)  | 20.2(6.1)   | 12.3 (11.0)                     | 0 (0/2617)                                                                 |
| 9. Portex (9) 8527MP SU                       |                                                                                    | 0.9 (5.0)  | 3.2 (30.4) | 6.6 (19.5) | 7.6 (18.4)  | 11.4 (12.3) | 14.7 (11.5) | 17.8 (7.8)  | 19.6 (4.0)  | 20.1 (1.6)  | 11.3 (12.3)                     | 0 (0/2776)                                                                 |
| 10. Headstar (10)<br>HP9333FN SU              |                                                                                    | 1.3 (42.1) | 4.0 (20.9) | 6.2 (20.4) | 8.5 (19.1)  | 11.3 (19.4) | 13.1 (18.8) | 15.8 (16.6) | 17.5 (14.6) | 19.2 (12.5) | 11.8 (20.5)                     | 0.1 (2/3280)                                                               |
| 11. Besmed (11) BE-<br>1703 SU                | 1.2 (24.1)                                                                         | 3.1 (25.4) | 5.0 (15.2) | 8.1 (8.6)  | 10.4 (10.4) | 13.2 (8.8)  | 16.1 (9.1)  | 18.2 (9.3)  | 20.8 (10.4) | 21.7 (9.7)  | 11.8 (13.1)                     | 7.1 (272/3857)                                                             |
| 12. Mercury (4) 1055299<br>SU                 |                                                                                    | 3.6 (0.9)  | 5.1 (23.6) | 9.4 (3.8)  | 11.2 (9.6)  | 15.4 (4.9)  | 19.2 (3.3)  | 21.8 (2.0)  | 24.8 (3.8)  | 25.1 (7.3)  | 16.1 (10.7)                     | 6.4 (82/1287)                                                              |
| 13. Hsiner (10) PH60103<br>SU                 | 1.2 (24.4)                                                                         | 3.1 (25.4) | 5.2 (12.4) | 8.2 (7.5)  | 10.6 (9.4)  | 13.4 (7.1)  | 16.3 (8.4)  | 18.4 (8.9)  | 21.0 (10.1) | 22.0 (8.8)  | 12.0 (12.2)                     | 7.7 (271/3523)                                                             |
| 14. Hsiner (7) 60152 SU                       | 1.9 (10.8)                                                                         | 3.2 (43.1) | 4.9 (19.5) | 8.1 (12.0) | 10.0 (14.1) | 12.9 (12.7) | 15.4 (13.5) | 17.6 (12.7) | 19.8 (12.5) | 21.1 (11.3) | 11.5 (15.3)                     | 4.6 (118/2571)                                                             |
| 15. Hsiner (5) 60113<br>SU                    |                                                                                    |            | 1.1 (1.6)  | 3.4 (81.6) | 3.8 (96.1)  | 6.2 (58.0)  | 9.1 (45.6)  | 12.1 (32.8) | 14.9 (30.0) | 17.4 (25.1) | 8.5 (46.4)                      | 2.9 (39/1340)                                                              |
| 16. Hudson RCI (9) 5364<br>SU                 |                                                                                    |            |            |            |             | 8.8 (4.2)   | 11.6 (14.7) | 14.7 (8.6)  | 17.5 (4.1)  | 18.6 (4.0)  | 14.2 (7.1)                      | 0 (0/1581)                                                                 |
| 17. Besmed (10)<br>BE-2701 SU                 |                                                                                    |            |            |            |             | 2.7 (5.3)   | 4.7 (94.8)  | 10.2 (47.0) | 16.5 (16.5) | 20.1 (7.2)  | 10.9 (34.2)                     | 0 (0/1597)                                                                 |
| 18. Hsiner (10) 60113-P<br>SU                 |                                                                                    |            | 1.5 (80.7) | 2.9 (67.7) | 3.8 (66.3)  | 7.5 (42.8)  | 9.8 (49.3)  | 13.7 (18.9) | 13.0 (38.0) | 15.8 (27.5) | 8.5 (48.9)                      | 0 (0/1727)                                                                 |
| 19. Zeal (5) RSB 1001<br>RU                   |                                                                                    |            |            | 2.5 (1.9)  | 3.5 (3.2)   | 3.4 (90.7)  | 7.9 (57.1)  | 12.1 (41.4) | 15.3 (34.9) | 18.4 (32.0) | 9.0 (47.3)                      | 3.7 (39/1057)                                                              |
| 20. Meditrin (5) Infant<br>250mL RU           |                                                                                    |            |            |            |             | 6.3 (54.8)  | 8.6 (36.0)  | 9.0 (41.9)  | 12.0 (35.1) | 16.0 (18.0) | 10.4 (37.2)                     | 0 (0/569)                                                                  |

^ total inflation numbers are for measurable volumes  
 \* Tidal volumes by compression distances all significantly different ANOVA repeated measures p<0.001  
 ‡Type: RU = Reusable, SU = Single use
